# Supplementary material for: Calcium-Induced Activity and Folding of a Repeat in Toxin Lipase from Antarctic Pseudomonas fluorescens Strain AMS8
Source: PubMed Central journal article supplement (PMC7020413; doi:10.3390/toxins12010027), 2020-01-01
Supplement: toxins-12-00027-s001.pdf [file toxins-12-00027-s001.pdf]

# Calcium-Induced Activity and Folding of a Repeat in Toxin Lipase from Antarctic *Pseudomonas fluorescens* Strain AMS8

Nur Shidaa Mohd Ali <sup>1,2</sup>, Abu Bakar Salleh <sup>1</sup>, Raja Noor Zaliha Raja Abd Rahman <sup>1,3</sup>, Thean Chor Leow <sup>1,4</sup> and Mohd Shukuri Mohamad Ali <sup>1,2,\*</sup>

<sup>1</sup> Enzyme and Microbial Technology Research Center, Faculty of Biotechnology and Biomolecular Sciences, Universiti Putra Malaysia, 43400 Serdang, Selangor, Malaysia; nur\_shidaa@yahoo.com (N.S.M.A.); abubakar@upm.edu.my (A.B.S.); rnzaliha@upm.edu.my (R.N.Z.R.A.R.); adamleow@upm.edu.my (T.C.L.)

<sup>2</sup> Department of Biochemistry, Faculty of Biotechnology and Biomolecular Sciences, Universiti Putra Malaysia, 43400 Serdang, Selangor, Malaysia.

<sup>3</sup> Department of Microbiology, Faculty of Biotechnology and Biomolecular Sciences, Universiti Putra Malaysia, 43400 Serdang, Selangor, Malaysia.

<sup>4</sup> Department of Cell and Molecular Biology, Faculty of Biotechnology and Biomolecular Sciences, Universiti Putra Malaysia, 43400 Serdang, Selangor, Malaysia.

\* Correspondence: mshukuri@upm.edu.my; Tel.: +603-9769 6721

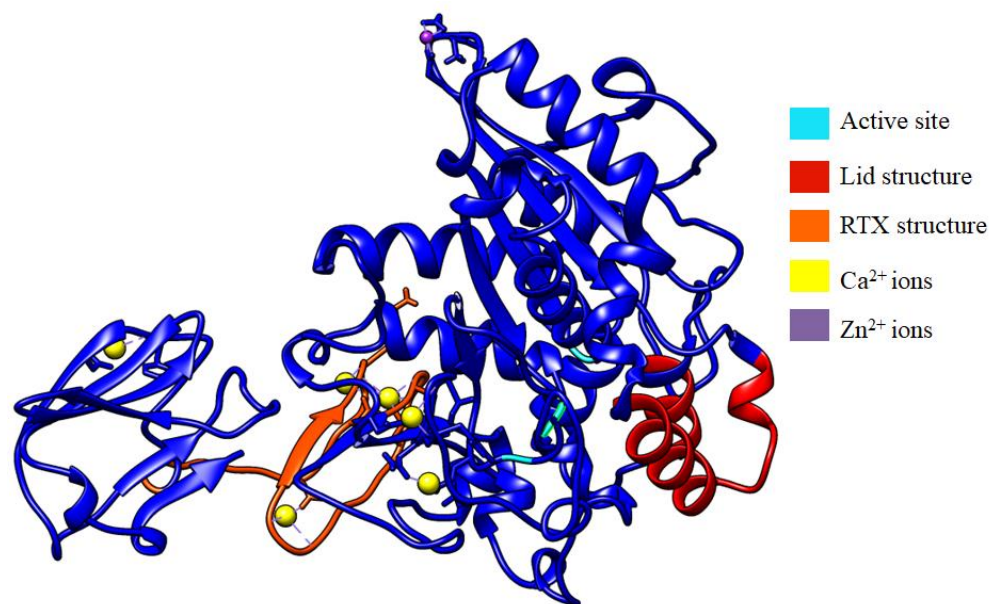

Figure S1: The predicted structure of AMS8 lipase obtained from Ali et al. (2013).
